# Supplementary material for: Segmentation of mediastinal lymph nodes in CT with anatomical priors
Source: Springer Nature journal article supplement (doi:10.1007/s11548-024-03165-4), 2024-05-13
Supplement: 11548_2024_3165_MOESM1_ESM.pdf [file 11548_2024_3165_MOESM1_ESM.pdf]

## 6 Supplementary Material

**Table 3:** Complete list of all organs and structures used for training the 3D nnUNet models in this work. 28 classes were generated by TotalSegmentator when it was executed on the 89 CT volumes in the NIH CT Lymph Node dataset. These were combined with the lymph node labels from the NIH CT Lymph Node dataset to yield the final 29 classes for training.

| #  | Structure                                                                                         | Class ID | Extracted From                         |
|----|---------------------------------------------------------------------------------------------------|----------|----------------------------------------|
| 1  | Body Region Mask                                                                                  | 1        | TotalSegmentator                       |
| 2  | Lymph Nodes                                                                                       | 1        | NIH CT LN data (annotated by St Olavs) |
| 3  | Spleen                                                                                            | 3        | TotalSegmentator                       |
| 4  | Kidneys (left & right)                                                                            | 4        | TotalSegmentator                       |
| 5  | Gall Bladder                                                                                      | 5        | TotalSegmentator                       |
| 6  | Liver                                                                                             | 6        | TotalSegmentator                       |
| 7  | Stomach                                                                                           | 7        | TotalSegmentator                       |
| 8  | Aorta                                                                                             | 8        | TotalSegmentator                       |
| 9  | Inferior Vena Cava                                                                                | 9        | TotalSegmentator                       |
| 10 | Portal and Splenic Vein                                                                           | 10       | TotalSegmentator                       |
| 11 | Pancreas                                                                                          | 11       | TotalSegmentator                       |
| 12 | Adrenal Glands (left & right)                                                                     | 12       | TotalSegmentator                       |
| 13 | Lung (all lobes)                                                                                  | 13       | TotalSegmentator                       |
| 14 | Skeleton (vertebrae & ribs & pelvis<br>& sacrum & humerus & scapula<br>& clavícula & femur & hip) | 14       | TotalSegmentator                       |
| 15 | Esophagus                                                                                         | 15       | TotalSegmentator                       |
| 16 | Trachea                                                                                           | 16       | TotalSegmentator                       |
| 17 | Heart (Myocardium & Atria & Ventricles)                                                           | 17       | TotalSegmentator                       |
| 18 | Pulmonary Artery                                                                                  | 18       | TotalSegmentator                       |
| 19 | Iliac Artery                                                                                      | 19       | TotalSegmentator                       |
| 20 | Iliac Vein                                                                                        | 20       | TotalSegmentator                       |
| 21 | Small Bowel                                                                                       | 21       | TotalSegmentator                       |
| 22 | Duodenum                                                                                          | 22       | TotalSegmentator                       |
| 23 | Colon                                                                                             | 23       | TotalSegmentator                       |
| 24 | Glutes Max                                                                                        | 24       | TotalSegmentator                       |
| 25 | Glutes Min                                                                                        | 25       | TotalSegmentator                       |
| 26 | Glutes Medius                                                                                     | 26       | TotalSegmentator                       |
| 27 | Autochthon                                                                                        | 27       | TotalSegmentator                       |
| 28 | Iliopsoas                                                                                         | 28       | TotalSegmentator                       |
| 29 | Urinary Bladder                                                                                   | 29       | TotalSegmentator                       |
